# Supplementary material for: Dung beetle (Coleoptera: Scarabaeoidea) assemblages in the western Italian Alps: benchmark data for land use monitoring
Source: Biodivers Data J. 2016 Nov 28;(4):e10059. doi: 10.3897/BDJ.4.e10059 (PMC5136653; doi:10.3897/BDJ.4.e10059)
Supplement: Supplementary material 1 — Dung beetles of Troncea B [file biodiversity_data_journal-4-e10059-s001.xlsx]

## Sheet: Troncea B
Date	Valley	Year	Month	Sampling occasion	Dominant plant species	Altitude	Site	Number of traps	Abundance	Species richness	Acrossus depressus (Kugelann)	Acrossus rufipes (Linnaeus)	Agoliinus satyrus (Reitter)	Amidorus immaturus (Mulsant)	Amidorus obscurus (Mulsant & Rey)	Anoplotrupes stercorosus (Scriba)	Aphodius fimetarius (Linnaeus)	Bodilopsis rufa (Moll)	Colobopterus erraticus (Linnaeus)	Coprimorphus scrutator (Herbst)	Esymus pusillus (Herbst)	Euheptaulacus carinatus (Germar)	Geotrupes stercorarius (Linnaeus)	Onthophagus baraudi (Nicolas)	Onthophagus fracticornis (Preyssler)	Oromus alpinus (Scopoli)	Otophorus haemorrhoidalis (Linnaeus)	Parammoecius corvinus (Erichson)	Planolinus fasciatus (Olivier)	Rhodaphodius foetens (Fabricius)	Teuchestes fossor (Linnaeus)	Trypocopris alpinus (Sturm & Hagenbach)
18.07.11	Troncea	2011	July	1	Rhododendron ferrugineum L.	2230	T_D	3	23	11	3	0	0	3	4	1	0	0	0	0	1	0	0	6	2	2	1	0	0	0	0	0
18.07.11	Troncea	2011	July	1	Rhododendron ferrugineum L.	2230	T_Dc	4	38	14	0	0	3	2	11	1	0	0	2	0	0	0	1	7	2	6	1	0	0	1	1	0
18.07.11	Troncea	2011	July	1	Rhododendron ferrugineum L.	2230	T_F	4	83	10	5	0	0	0	49	1	0	0	0	0	0	0	0	11	9	3	0	2	0	0	3	0
18.07.11	Troncea	2011	July	1	Rhododendron ferrugineum L.	2230	T_Fc	4	90	13	4	1	25	0	10	0	0	0	0	1	0	0	1	9	3	34	0	1	0	0	1	0
14.07.11	Troncea	2011	July	1	Rhododendron ferrugineum L.	2230	T_G	4	52	8	2	5	40	0	0	0	0	0	0	0	0	0	0	1	0	1	0	0	1	2	0	0
14.07.11	Troncea	2011	July	1	Rhododendron ferrugineum L.	2230	T_Gc	4	92	11	1	3	28	0	32	0	0	0	3	0	0	0	0	16	2	6	0	0	1	0	0	0
14.07.11	Troncea	2011	July	1	Rhododendron ferrugineum L.	2300	T_H	4	95	12	12	5	8	0	31	0	0	0	2	0	0	0	1	20	3	11	2	0	0	0	0	0
14.07.11	Troncea	2011	July	1	Rhododendron ferrugineum L.	2300	T_Hc	4	130	11	14	0	7	13	56	1	0	0	0	0	0	0	1	16	11	11	0	0	0	0	0	0
14.07.11	Troncea	2011	July	1	Rhododendron ferrugineum L.	2000	T01	5	31	12	0	0	0	2	8	1	0	1	0	2	0	0	0	8	3	0	0	0	0	1	4	1
14.07.11	Troncea	2011	July	1	Rhododendron ferrugineum L.	2000	T01c	5	147	15	0	6	52	1	26	19	0	0	1	1	0	1	0	27	8	0	0	0	2	2	0	1
14.07.11	Troncea	2011	July	1	Rhododendron ferrugineum L.	2180	T02	6	249	18	16	5	35	19	90	1	0	0	4	0	0	0	2	37	15	12	4	0	3	2	2	2
14.07.11	Troncea	2011	July	1	Rhododendron ferrugineum L.	2180	T02c	6	194	13	6	0	31	9	79	2	0	0	1	0	0	0	1	14	20	28	0	0	0	0	0	3
14.07.11	Troncea	2011	July	1	Rhododendron ferrugineum L.	2300	T03c	5	28	7	2	2	14	0	4	0	0	0	0	0	0	0	0	2	0	4	0	0	0	0	0	0
14.07.11	Troncea	2011	July	1	Rhododendron ferrugineum L.	2300	T03	6	116	12	30	1	11	0	37	1	0	0	2	0	0	0	0	17	14	2	1	0	0	0	0	0
18.07.11	Troncea	2011	July	1	Rhododendron ferrugineum L.	2350	T04	na	na	na	na	na	na	na	na	na	na	na	na	na	na	na	na	na	na	na	na	na	na	na	na	na
18.07.11	Troncea	2011	July	1	Rhododendron ferrugineum L.	2350	T04c	5	28	4	1	5	20	2	0	0	0	0	0	0	0	0	0	0	0	0	0	0	0	0	0	0
05.08.11	Troncea	2011	August	2	Rhododendron ferrugineum L.	2230	T_D	4	18	6	3	1	0	0	9	0	0	0	0	0	1	0	0	0	0	2	2	0	0	0	0	0
05.08.11	Troncea	2011	August	2	Rhododendron ferrugineum L.	2230	T_Dc	4	34	6	0	1	5	0	18	0	0	1	0	0	0	0	0	0	0	0	7	0	2	0	0	0
05.08.11	Troncea	2011	August	2	Rhododendron ferrugineum L.	2234	T_F	4	30	8	5	1	4	2	3	0	0	0	0	0	0	0	0	0	0	2	6	0	7	0	0	0
05.08.11	Troncea	2011	August	2	Rhododendron ferrugineum L.	2238	T_Fc	4	39	7	5	1	27	0	1	0	0	0	0	0	0	1	0	0	0	0	3	0	1	0	0	0
05.08.11	Troncea	2011	August	2	Rhododendron ferrugineum L.	2242	T_G	4	39	4	0	10	28	0	0	0	0	0	0	0	0	0	0	1	0	0	0	0	0	0	0	0
05.08.11	Troncea	2011	August	2	Rhododendron ferrugineum L.	2246	T_Gc	3	21	9	0	1	6	0	1	0	0	2	0	0	0	8	0	2	1	0	0	0	0	0	0	0
05.08.11	Troncea	2011	August	2	Rhododendron ferrugineum L.	2250	T_H	4	120	14	4	1	68	7	14	1	0	0	1	0	0	9	0	9	4	0	1	0	1	0	0	0
05.08.11	Troncea	2011	August	2	Rhododendron ferrugineum L.	2254	T_Hc	4	125	14	1	3	56	0	15	0	0	2	0	0	3	19	0	17	5	2	1	0	1	0	0	0
05.08.11	Troncea	2011	August	2	Rhododendron ferrugineum L.	2000	T01	5	1059	15	0	3	6	1	28	4	0	22	1	0	0	872	1	74	43	1	3	0	0	0	0	0
05.08.11	Troncea	2011	August	2	Rhododendron ferrugineum L.	2000	T01c	5	307	14	0	9	10	3	10	8	0	20	76	0	0	147	0	15	7	1	1	0	0	0	0	0
05.08.11	Troncea	2011	August	2	Rhododendron ferrugineum L.	2180	T02	6	235	14	1	9	66	0	47	1	0	6	0	0	4	26	0	44	25	2	4	0	0	0	0	0
05.08.11	Troncea	2011	August	2	Rhododendron ferrugineum L.	2180	T02c	6	165	15	2	3	92	0	12	0	0	4	1	0	2	11	0	11	13	11	2	0	1	0	0	0
05.08.11	Troncea	2011	August	2	Rhododendron ferrugineum L.	2300	T03	6	64	16	3	5	6	4	16	4	0	0	2	0	2	2	0	4	5	4	5	0	2	0	0	0
05.08.11	Troncea	2011	August	2	Rhododendron ferrugineum L.	2300	T03c	6	64	9	9	5	9	0	22	0	0	0	0	0	0	0	0	0	5	11	2	0	0	0	1	0
05.08.11	Troncea	2011	August	2	Rhododendron ferrugineum L.	2350	T04c	5	8	6	0	1	2	0	2	0	0	1	0	0	0	1	0	0	0	1	0	0	0	0	0	0
05.08.11	Troncea	2011	August	2	Rhododendron ferrugineum L.	2350	T04	6	47	10	3	0	24	0	4	0	0	4	0	0	0	0	0	1	2	3	6	0	0	0	0	0
25.08.11	Troncea	2011	August	3	Rhododendron ferrugineum L.	2230	T_D	4	112	9	0	25	8	0	49	0	0	0	0	0	5	1	0	0	5	15	0	0	4	0	0	0
25.08.11	Troncea	2011	August	3	Rhododendron ferrugineum L.	2230	T_Dc	4	184	12	0	32	57	3	7	0	0	2	0	0	0	3	0	0	3	10	1	1	65	0	0	0
25.08.11	Troncea	2011	August	3	Rhododendron ferrugineum L.	2230	T_F	4	348	17	0	30	58	1	13	0	1	2	0	1	2	2	0	1	6	9	6	3	213	0	0	0
25.08.11	Troncea	2011	August	3	Rhododendron ferrugineum L.	2230	T_Fc	4	705	15	1	40	180	1	10	0	0	4	0	0	0	1	0	1	1	12	1	8	445	0	0	0
25.08.11	Troncea	2011	August	3	Rhododendron ferrugineum L.	2230	T_G	4	467	10	0	16	56	0	4	0	0	6	0	0	1	2	0	1	0	3	0	0	378	0	0	0
25.08.11	Troncea	2011	August	3	Rhododendron ferrugineum L.	2230	T_Gc	4	349	11	0	10	54	0	3	0	0	15	0	1	0	18	0	0	1	1	1	0	245	0	0	0
25.08.11	Troncea	2011	August	3	Rhododendron ferrugineum L.	2230	T_H	4	517	8	0	79	57	0	3	0	0	26	0	0	0	18	0	0	0	1	2	0	331	0	0	0
25.08.11	Troncea	2011	August	3	Rhododendron ferrugineum L.	2230	T_Hc	4	69	7	0	8	20	0	1	0	0	2	0	0	0	4	0	0	0	4	0	0	30	0	0	0
19.08.11	Troncea	2011	August	3	Rhododendron ferrugineum L.	2000	T01	6	457	10	0	21	9	7	68	0	0	75	0	0	0	257	0	0	3	5	0	0	12	0	0	0
19.08.11	Troncea	2011	August	3	Rhododendron ferrugineum L.	2000	T01c	6	360	10	0	15	20	0	14	1	0	106	0	0	0	84	0	0	3	12	0	0	105	0	0	0
19.08.11	Troncea	2011	August	3	Rhododendron ferrugineum L.	2180	T02	4	146	8	0	6	11	0	3	0	0	14	0	0	1	6	0	0	0	4	0	0	101	0	0	0
19.08.11	Troncea	2011	August	3	Rhododendron ferrugineum L.	2300	T03c	6	261	11	0	9	53	2	5	0	0	6	0	0	1	20	0	0	1	9	0	0	155	0	0	0
25.08.11	Troncea	2011	August	3	Rhododendron ferrugineum L.	2300	T03	6	221	14	0	83	51	0	11	3	0	3	0	1	0	8	0	2	4	6	5	0	44	0	0	0
25.08.11	Troncea	2011	August	3	Rhododendron ferrugineum L.	2350	T04c	6	415	13	0	187	96	0	24	4	1	3	0	0	1	3	0	0	5	3	3	0	85	0	0	0
25.08.11	Troncea	2011	August	3	Rhododendron ferrugineum L.	2350	T04	6	131	11	0	38	47	1	1	0	0	5	0	2	0	1	0	0	0	5	1	0	28	0	2	0
25.08.11	Troncea	2011	August	3	Rhododendron ferrugineum L.	2350	T04c	6	975	19	1	356	286	1	17	2	1	25	0	2	3	14	0	1	9	34	7	0	214	0	2	0
13.09.11	Troncea	2011	September	4	Rhododendron ferrugineum L.	2230	T_D	4	66	12	0	3	4	1	3	0	0	3	0	2	0	0	0	0	2	3	1	4	40	0	0	0
13.09.11	Troncea	2011	September	4	Rhododendron ferrugineum L.	2230	T_Dc	4	122	9	0	0	2	0	0	0	0	1	0	0	0	1	0	0	2	2	0	15	97	0	0	2
13.09.11	Troncea	2011	September	4	Rhododendron ferrugineum L.	2230	T_F	4	602	12	0	1	7	0	5	0	2	1	0	0	1	1	0	0	0	5	2	8	567	0	0	2
13.09.11	Troncea	2011	September	4	Rhododendron ferrugineum L.	2230	T_Fc	4	663	15	2	2	11	3	1	1	3	1	0	1	0	1	0	0	2	0	0	42	590	0	0	3
13.09.11	Troncea	2011	September	4	Rhododendron ferrugineum L.	2230	T_G	na	na	na	na	na	na	na	na	na	na	na	na	na	na	na	na	na	na	na	na	na	na	na	na	na
13.09.11	Troncea	2011	September	4	Rhododendron ferrugineum L.	2230	T_Gc	na	na	na	na	na	na	na	na	na	na	na	na	na	na	na	na	na	na	na	na	na	na	na	na	na
13.09.11	Troncea	2011	September	4	Rhododendron ferrugineum L.	2230	T_H	na	na	na	na	na	na	na	na	na	na	na	na	na	na	na	na	na	na	na	na	na	na	na	na	na
13.09.11	Troncea	2011	September	4	Rhododendron ferrugineum L.	2230	T_Hc	na	na	na	na	na	na	na	na	na	na	na	na	na	na	na	na	na	na	na	na	na	na	na	na	na
25.08.11	Troncea	2011	August	4	Rhododendron ferrugineum L.	2000	T01	na	na	na	na	na	na	na	na	na	na	na	na	na	na	na	na	na	na	na	na	na	na	na	na	na
25.08.11	Troncea	2011	August	4	Rhododendron ferrugineum L.	2000	T01c	na	na	na	na	na	na	na	na	na	na	na	na	na	na	na	na	na	na	na	na	na	na	na	na	na
25.08.11	Troncea	2011	August	4	Rhododendron ferrugineum L.	2180	T02	na	na	na	na	na	na	na	na	na	na	na	na	na	na	na	na	na	na	na	na	na	na	na	na	na
25.08.11	Troncea	2011	August	4	Rhododendron ferrugineum L.	2180	T02c	na	na	na	na	na	na	na	na	na	na	na	na	na	na	na	na	na	na	na	na	na	na	na	na	na
25.08.11	Troncea	2011	August	4	Rhododendron ferrugineum L.	2300	T03	6	248	10	0	8	12	0	4	0	0	4	0	0	0	5	0	0	8	0	4	17	186	0	0	0
25.08.11	Troncea	2011	August	4	Rhododendron ferrugineum L.	2300	T03c	6	158	11	0	9	7	1	2	0	0	1	0	1	0	2	0	0	0	1	1	17	116	0	0	0
25.08.11	Troncea	2011	August	4	Rhododendron ferrugineum L.	2350	T04	6	379	15	0	11	31	3	4	0	0	9	1	0	0	3	1	0	2	5	3	3	301	0	0	2
25.08.11	Troncea	2011	August	4	Rhododendron ferrugineum L.	2350	T04c	6	373	16	0	5	3	2	7	1	0	9	1	0	0	6	0	2	8	5	1	0	321	0	0	2
